# Supplementary material
Source: MDPI journal article supplement (https://www.mdpi.com/2673-9976/18/1/38)
Supplement: s1 [file s1]

# EFFECTS OF PARTIALLY SUBSTITUTING WHEAT FLOUR WITH TIGER NUT FLOUR ON THE PHYSICAL AND SENSORY PROPERTIES OF DIFFERENT TYPES OF BREAD

**Joshua Akanson<sup>1</sup>, Nazir Kizzie-Hayford<sup>2</sup>, Jerry Ampofo-Asiama<sup>2</sup>, Ernest Ekow Abano<sup>1</sup>**

Department of Agricultural Engineering<sup>1</sup>, Department of Biochemistry<sup>2</sup>, College of Agriculture and Natural Sciences

University of Cape Coast, Cape Coast, Ghana.

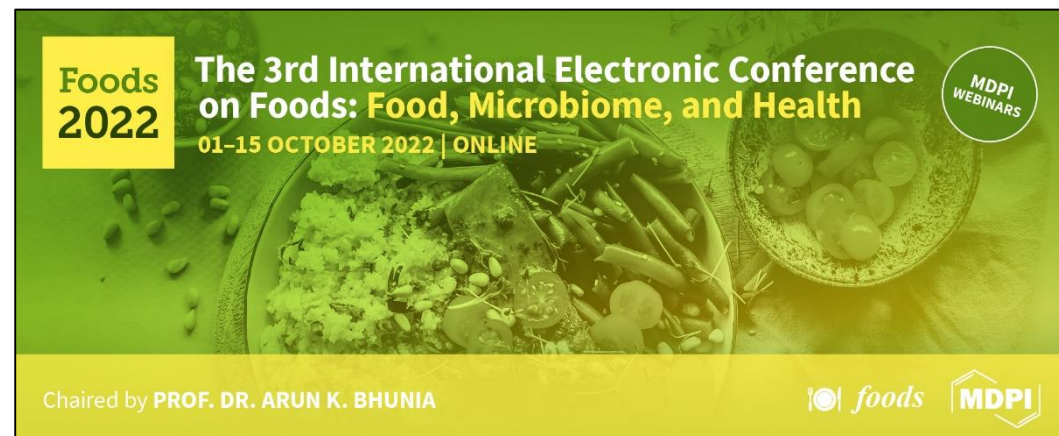

## Background

- Tiger nut, a tuberous rhizome is a rich source of nutrients, phytochemicals, vitamins C and E
- Grows in temperate and tropical regions, especially in Ghana and several West African countries
- Investigated for use as vegetable milk, yoghurt, vegetable oils, biscuit, pasta egg tagliatelle, extruded products, bread etc.

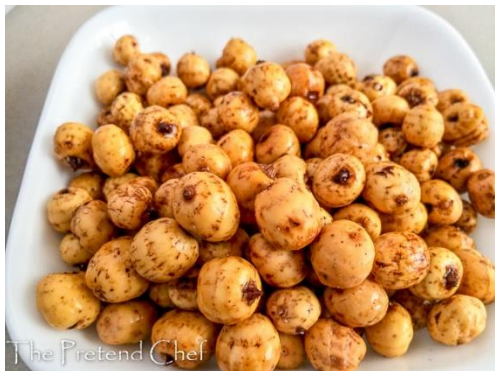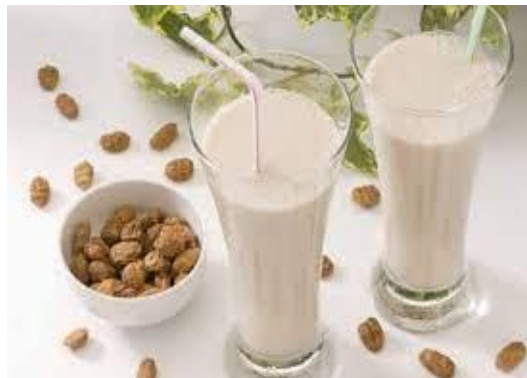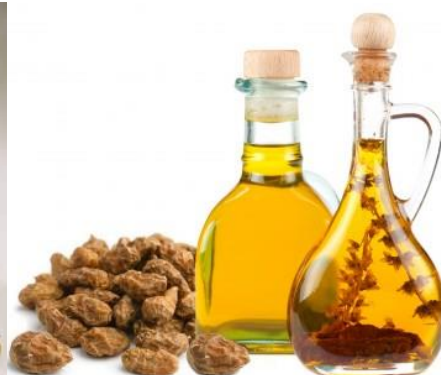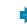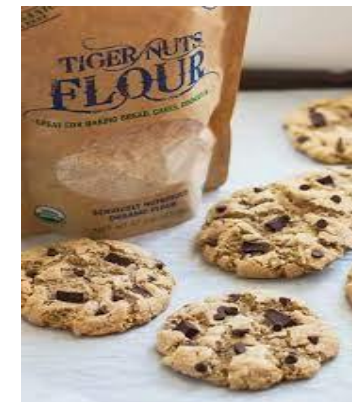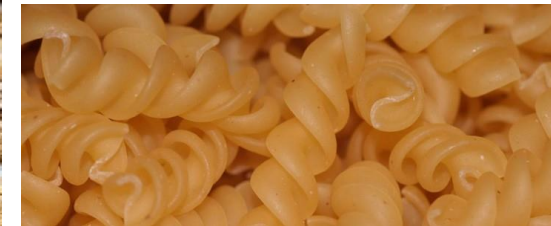

## Background

- Use for bread, a world-wide staple, could improve tiger nut utilization for food whilst enhancing properties of some types of bread (Oke et al. 2019)
- Several types of bread form a major staple in Ghana but
- Currently wheat flour is limited, affecting cost and access to bread in Ghana
- Partial substitution of wheat flour with tiger nut flour could be relevant

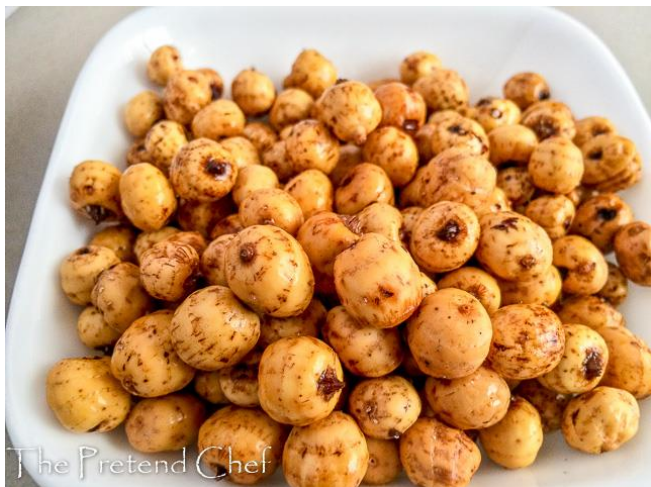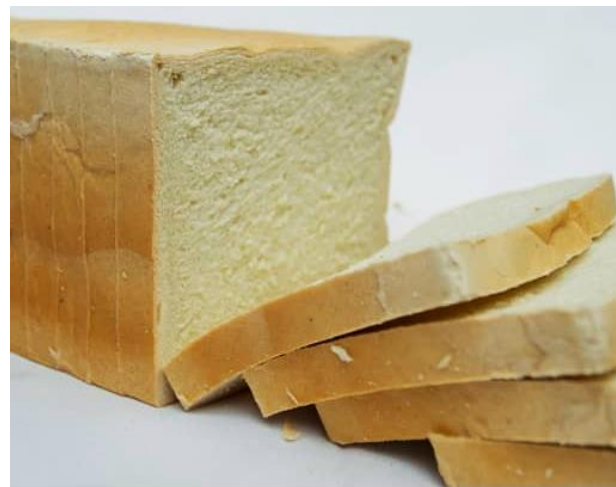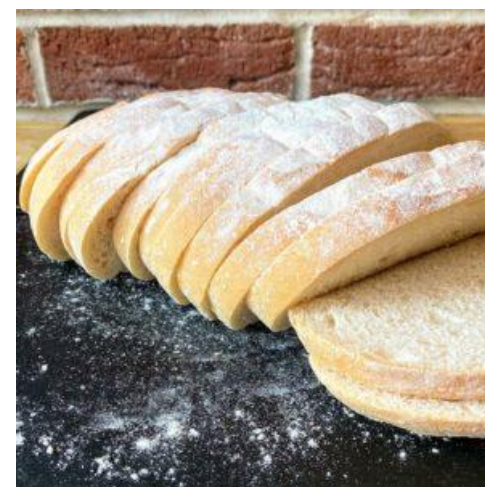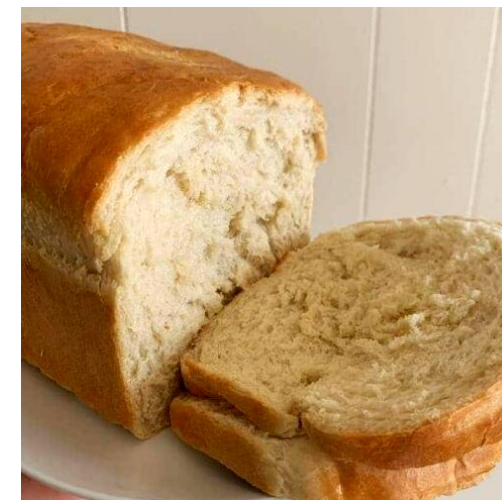

## Aim of study

- To determine the effects of partially substituting wheat flour with tiger nut flour on the physicochemical and sensory properties of different types of bread

## Research questions

1. What is the acceptable levels for partially substituting wheat flour with tiger nut flour in different bread types?
2. How does the substitution influence the physical and nutritional properties?
3. How does the substituting affect the sensory properties and consumer acceptability?

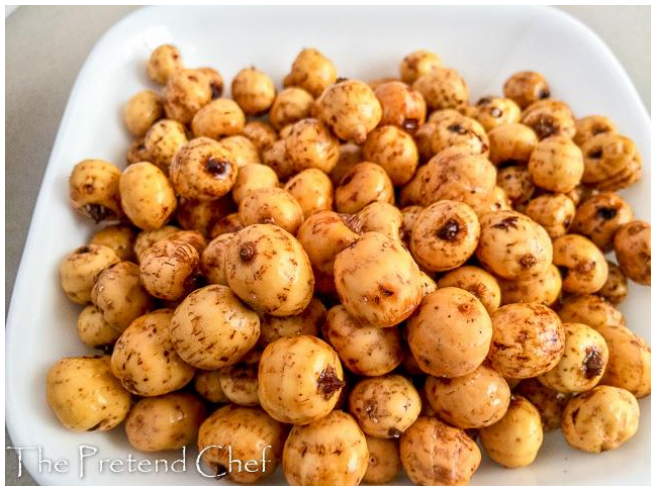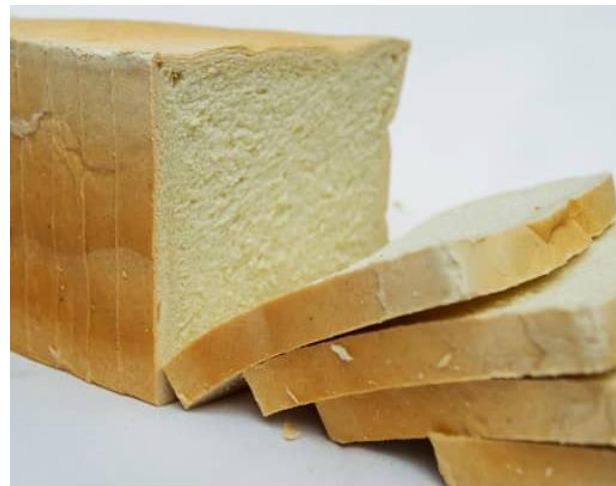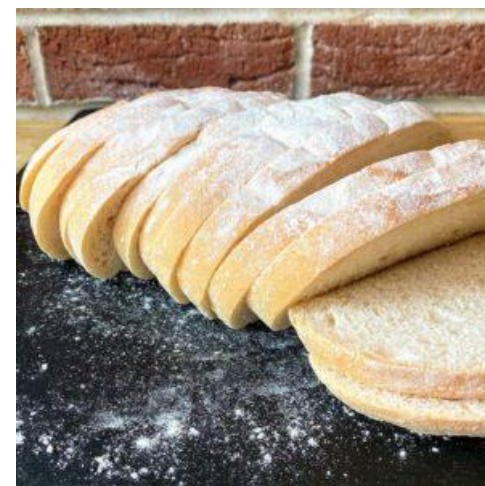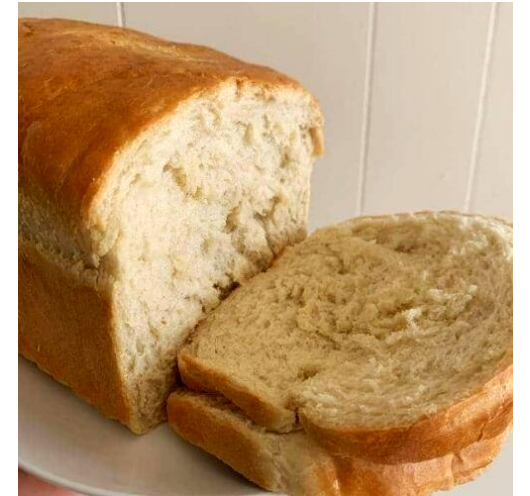

# EXPERIMENTAL OUTLINE

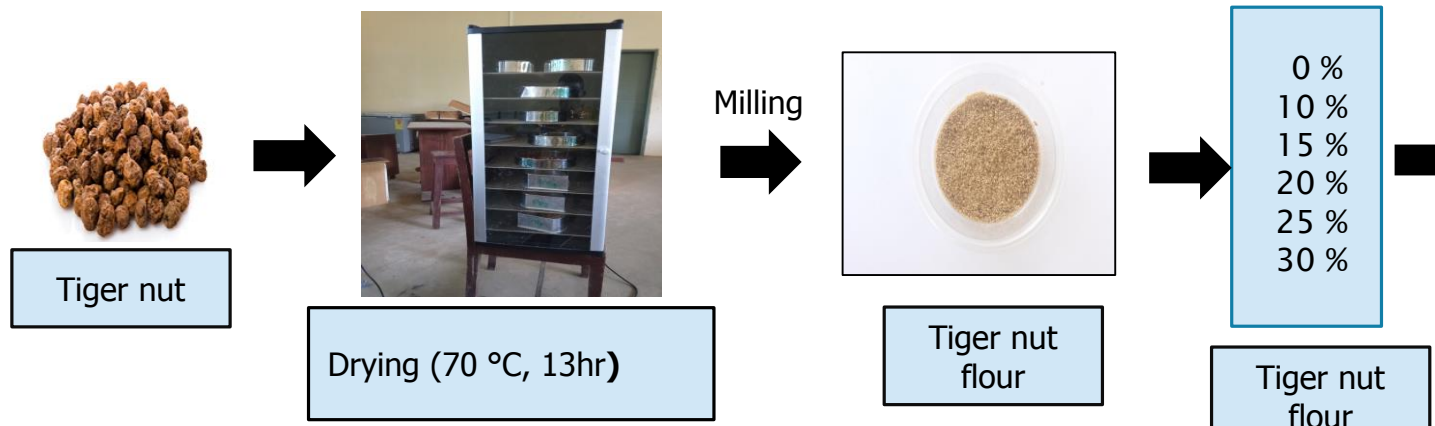

## Analyses:

|                                                                               |                                                                               |                                                                   |
|-------------------------------------------------------------------------------|-------------------------------------------------------------------------------|-------------------------------------------------------------------|
| <u>Physical</u><br>Browning<br>Crust lightness<br>Specific volume<br>Firmness | <u>Sensory</u><br>Colour<br>Aroma<br>Mouthfeel<br>Aftertaste<br>Acceptability | <u>Nutrient</u><br>Protein<br>Fat<br>Fiber<br>Ash<br>Carbohydrate |
|-------------------------------------------------------------------------------|-------------------------------------------------------------------------------|-------------------------------------------------------------------|

| Ingredients (g) |  Tea Bread |  Sugar bread |  Butter bread |
|-----------------|-----------------------------------------------------------------------------------------------|-------------------------------------------------------------------------------------------------|--------------------------------------------------------------------------------------------------|
| Flour           | 1250                                                                                          | 1250                                                                                            | 1250                                                                                             |
| Margarine       | 144                                                                                           | 144                                                                                             | 288                                                                                              |
| Salt            | 9                                                                                             | 6                                                                                               | 9                                                                                                |
| Sugar           | 68                                                                                            | 214.5                                                                                           | 68                                                                                               |
| Yeast           | 0.6                                                                                           | 0.6                                                                                             | 0.6                                                                                              |
| Nutmeg          | 3                                                                                             | 3                                                                                               | 3                                                                                                |
| Water (mL)      | 650                                                                                           | 650                                                                                             | 650                                                                                              |

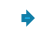

# Results: Effects on physical properties of butter, tea and sugar breads

## Wheat flour (WF) substituted with various amounts of tiger nut flour (WF:TNF) in Sugar bread

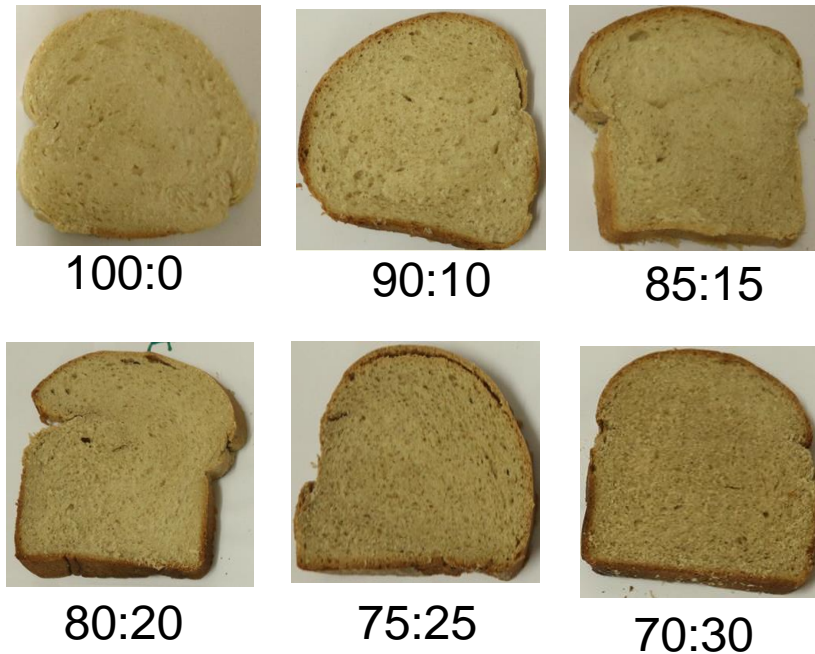

## Browning index

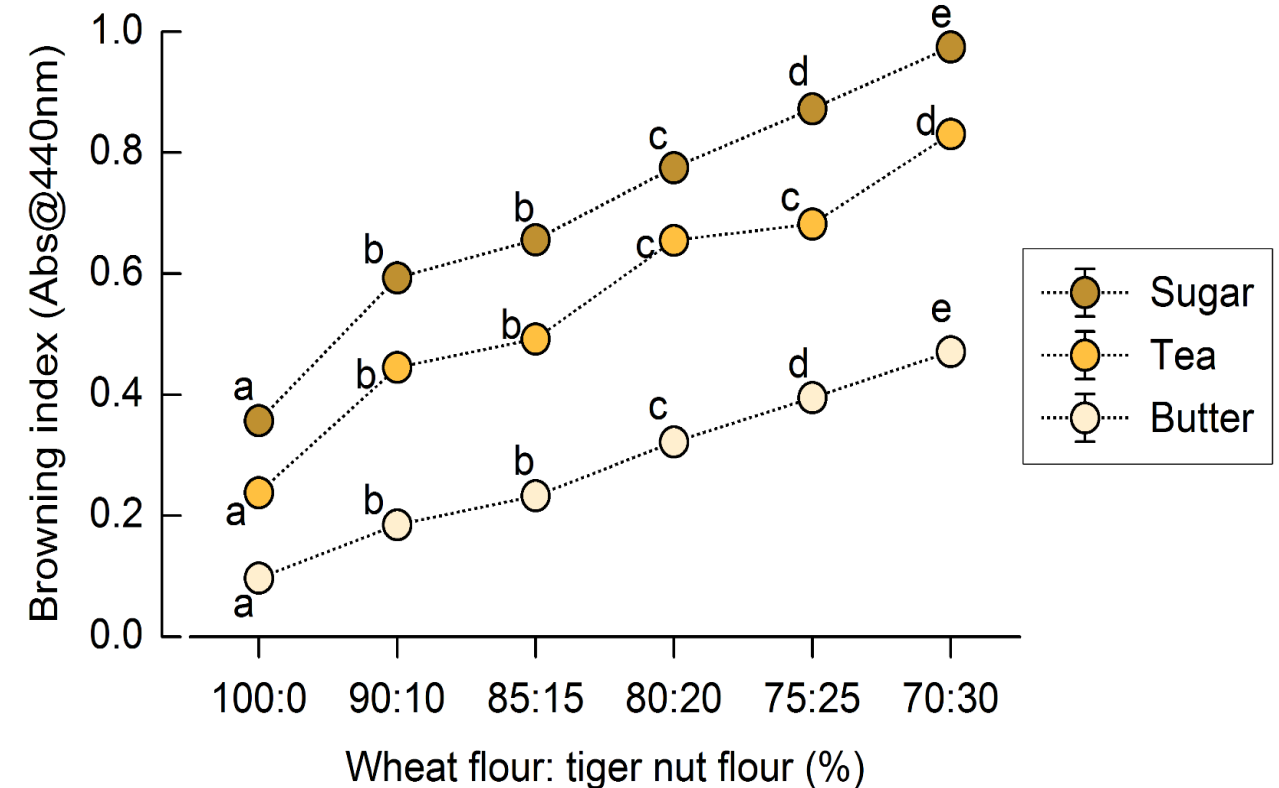

# Results: Physical properties of butter, tea and sugar breads

- Butter bread showed the highest specific volume
- Partial substitution with TNF decreased the specific volume
- Effects of substitution levels on specific volume depends on the type of bread

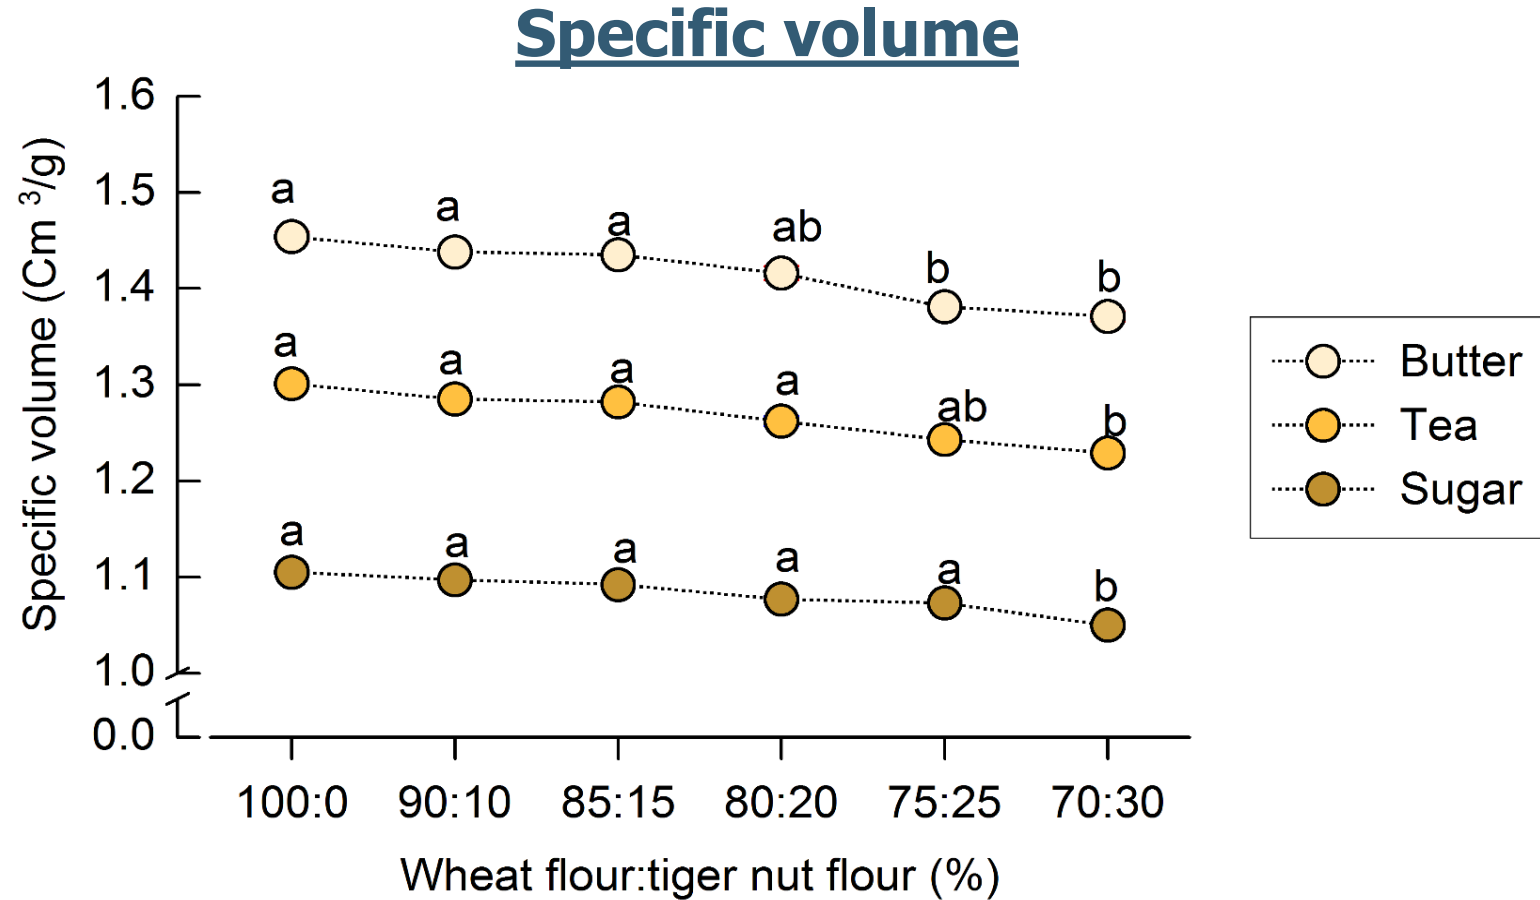

# Results: Physical properties of butter, tea and sugar breads

- Crumb firmness: Sugar bread ( $S_b$ ) > Tea bread ( $T_b$ ) > Butter bread ( $B_b$ )
- Storage significantly increased firmness of  $S_b$  &  $T_b$  but not  $B_b$
- Effects of TNF on firmness insignificant for  $B_b$

## Crumb firmness during 3 d storage

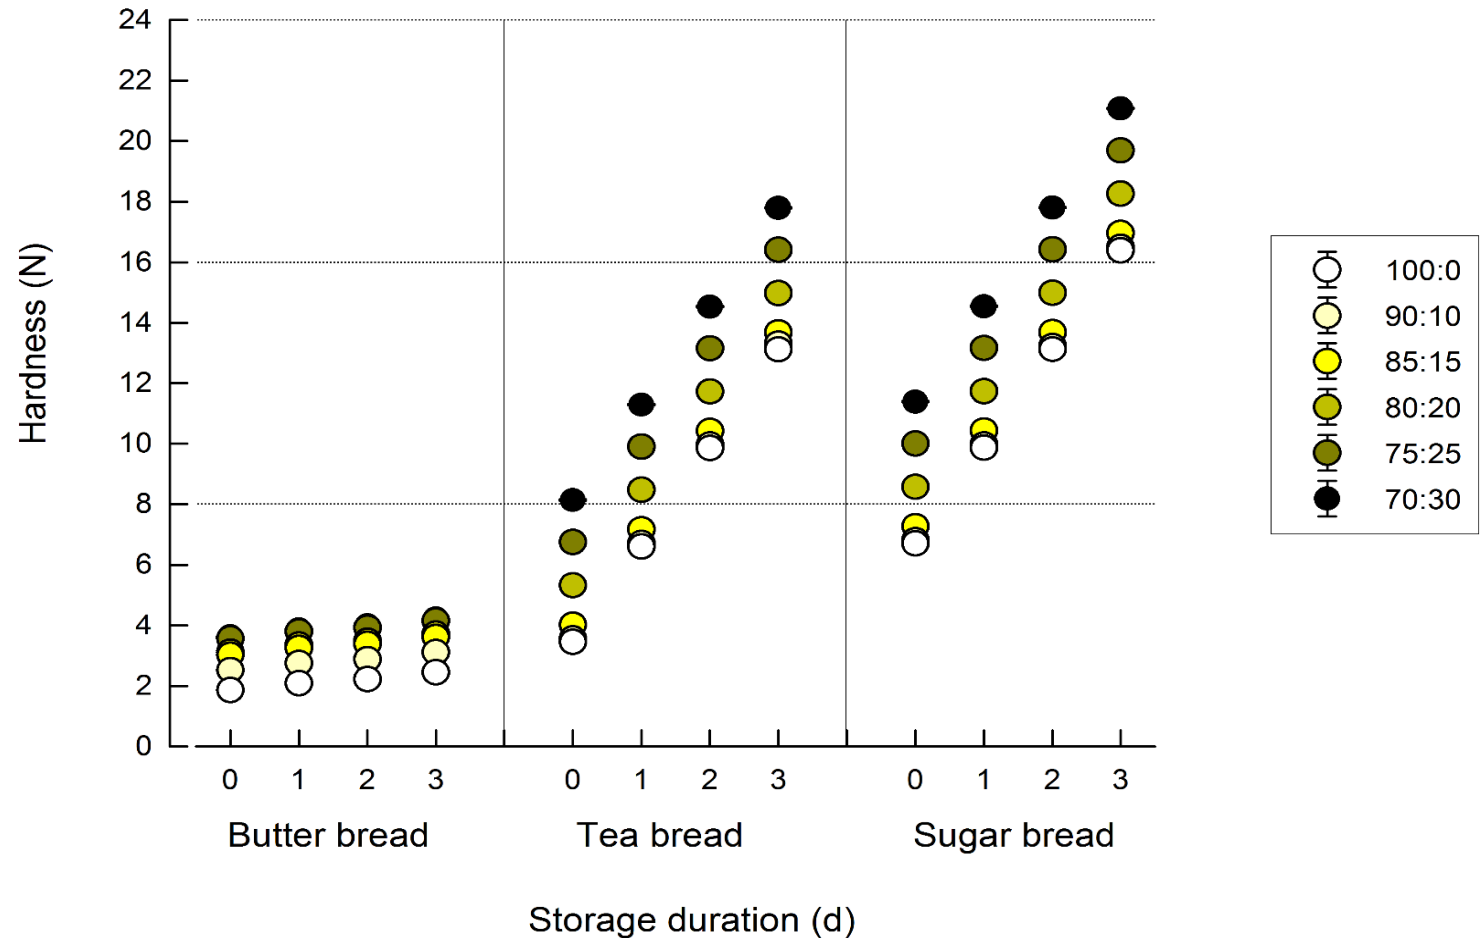



# Results: Consumer (n=56) scores for butter, tea and sugar breads

- B<sub>b</sub>: improved aroma (all levels); mouthfeel, acceptability (10 or 30 %); aftertaste, overall highest rating (10 %)
- T<sub>b</sub>: Low consumer scores; improved all attributes, highest consumer rating (25 %)
- S<sub>b</sub>: marginal improvement in consumer acceptance (30 %)

| Bread type   | WF:TNF<br>composit<br>e | Crumb<br>appearance       | Crust<br>appearance       | Aroma                     | Mouthfeel                 | Aftertaste                | Overall<br>Acceptability |
|--------------|-------------------------|---------------------------|---------------------------|---------------------------|---------------------------|---------------------------|--------------------------|
| Butter bread | 100:0                   | 6.98 ± 0.27 <sup>a</sup>  | 6.74 ± 0.29 <sup>a</sup>  | 5.76 ± 0.34 <sup>a</sup>  | 6.32 ± 0.32 <sup>a</sup>  | 6.04 ± 0.32 <sup>a</sup>  | 6.50 ± 0.33 <sup>a</sup> |
|              | 90:10                   | 7.06 ± 0.20 <sup>a</sup>  | 6.80 ± 0.25 <sup>a</sup>  | 6.80 ± 0.23 <sup>b</sup>  | 6.98 ± 0.27 <sup>ab</sup> | 7.10 ± 0.27 <sup>b</sup>  | 7.56 ± 0.23 <sup>b</sup> |
|              | 85:15                   | 6.02 ± 0.22 <sup>b</sup>  | 5.54 ± 0.29 <sup>b</sup>  | 6.26 ± 0.26 <sup>b</sup>  | 6.26 ± 0.26 <sup>a</sup>  | 6.52 ± 0.21 <sup>a</sup>  | 6.74 ± 0.20 <sup>a</sup> |
|              | 80:20                   | 6.80 ± 0.21 <sup>a</sup>  | 6.52 ± 0.21 <sup>a</sup>  | 6.76 ± 0.17 <sup>b</sup>  | 6.42 ± 0.25 <sup>a</sup>  | 6.62 ± 0.21 <sup>a</sup>  | 6.92 ± 0.17 <sup>a</sup> |
|              | 75:25                   | 6.48 ± 0.26 <sup>ab</sup> | 6.26 ± 0.27 <sup>ab</sup> | 6.22 ± 0.23 <sup>b</sup>  | 6.44 ± 0.21 <sup>a</sup>  | 6.58 ± 0.25 <sup>a</sup>  | 6.82 ± 0.23 <sup>a</sup> |
|              | 70:30                   | 6.94 ± 0.22 <sup>a</sup>  | 6.80 ± 0.19 <sup>a</sup>  | 6.94 ± 0.17 <sup>b</sup>  | 7.00 ± 0.21 <sup>b</sup>  | 6.36 ± 0.18 <sup>a</sup>  | 7.32 ± 0.17 <sup>b</sup> |
| Tea bread    | 100:0                   | 5.00 ± 0.22 <sup>a</sup>  | 5.61 ± 0.29 <sup>a</sup>  | 4.52 ± 0.22 <sup>a</sup>  | 4.65 ± 0.26 <sup>a</sup>  | 4.69 ± 0.24 <sup>a</sup>  | 4.81 ± 0.27 <sup>a</sup> |
|              | 90:10                   | 6.37 ± 0.22 <sup>b</sup>  | 5.74 ± 0.25 <sup>a</sup>  | 5.46 ± 0.20 <sup>b</sup>  | 5.67 ± 0.22 <sup>b</sup>  | 5.41 ± 0.23 <sup>b</sup>  | 5.57 ± 0.23 <sup>b</sup> |
|              | 85:15                   | 6.64 ± 0.20 <sup>b</sup>  | 6.22 ± 0.27 <sup>b</sup>  | 4.94 ± 0.28 <sup>a</sup>  | 5.50 ± 0.27 <sup>b</sup>  | 5.68 ± 0.25 <sup>b</sup>  | 5.64 ± 0.27 <sup>b</sup> |
|              | 80:20                   | 6.66 ± 0.19 <sup>b</sup>  | 6.40 ± 0.23 <sup>b</sup>  | 5.34 ± 0.27 <sup>b</sup>  | 5.72 ± 0.28 <sup>b</sup>  | 5.86 ± 0.30 <sup>b</sup>  | 6.08 ± 0.25 <sup>b</sup> |
|              | 75:25                   | 6.88 ± 0.14 <sup>b</sup>  | 6.64 ± 0.15 <sup>b</sup>  | 6.74 ± 0.18 <sup>c</sup>  | 6.98 ± 0.17 <sup>c</sup>  | 7.04 ± 0.15 <sup>c</sup>  | 7.18 ± 0.14 <sup>c</sup> |
|              | 70:30                   | 6.82 ± 0.26 <sup>b</sup>  | 6.54 ± 0.15 <sup>b</sup>  | 6.76 ± 0.21 <sup>c</sup>  | 6.44 ± 0.27 <sup>c</sup>  | 6.50 ± 0.25 <sup>d</sup>  | 6.88 ± 0.25 <sup>d</sup> |
| Sugar bread  | 100:0                   | 7.16 ± 0.27 <sup>a</sup>  | 6.62 ± 0.28 <sup>a</sup>  | 5.86 ± 0.27 <sup>a</sup>  | 6.22 ± 0.27 <sup>a</sup>  | 6.10 ± 0.25 <sup>a</sup>  | 6.68 ± 0.24 <sup>a</sup> |
|              | 90:10                   | 6.80 ± 0.21 <sup>a</sup>  | 6.62 ± 0.24 <sup>a</sup>  | 5.80 ± 0.24 <sup>a</sup>  | 6.34 ± 0.24 <sup>a</sup>  | 6.58 ± 0.19 <sup>a</sup>  | 6.52 ± 0.21 <sup>a</sup> |
|              | 85:15                   | 6.86 ± 0.19 <sup>a</sup>  | 7.18 ± 0.16 <sup>b</sup>  | 6.10 ± 0.28 <sup>ab</sup> | 6.50 ± 0.23 <sup>ab</sup> | 6.68 ± 0.19 <sup>ab</sup> | 6.70 ± 0.21 <sup>a</sup> |
|              | 80:20                   | 6.62 ± 0.17 <sup>ab</sup> | 6.40 ± 0.22 <sup>a</sup>  | 5.78 ± 0.25 <sup>a</sup>  | 6.36 ± 0.25 <sup>a</sup>  | 6.44 ± 0.25 <sup>ab</sup> | 6.48 ± 0.25 <sup>a</sup> |
|              | 75:25                   | 6.48 ± 0.26 <sup>b</sup>  | 6.26 ± 0.27 <sup>a</sup>  | 6.22 ± 0.23 <sup>b</sup>  | 6.44 ± 0.21 <sup>ab</sup> | 6.58 ± 0.25 <sup>ab</sup> | 6.82 ± 0.23 <sup>a</sup> |
|              | 70:30                   | 6.50 ± 0.26 <sup>b</sup>  | 5.92 ± 0.31 <sup>c</sup>  | 6.32 ± 0.23 <sup>b</sup>  | 6.80 ± 0.22 <sup>b</sup>  | 6.58 ± 0.26 <sup>ab</sup> | 6.86 ± 0.22 <sup>a</sup> |

# Results: GPA of group average plots for descriptors of Butter

- 26 different descriptors generated
- $B_b$ : firm, moist, buttery, smooth and astringent
- $T_{10}B_b$ : chewy, firm, sweet, porous, dry and caramel
- TNF affects bread attributes and can influence consumer acceptance

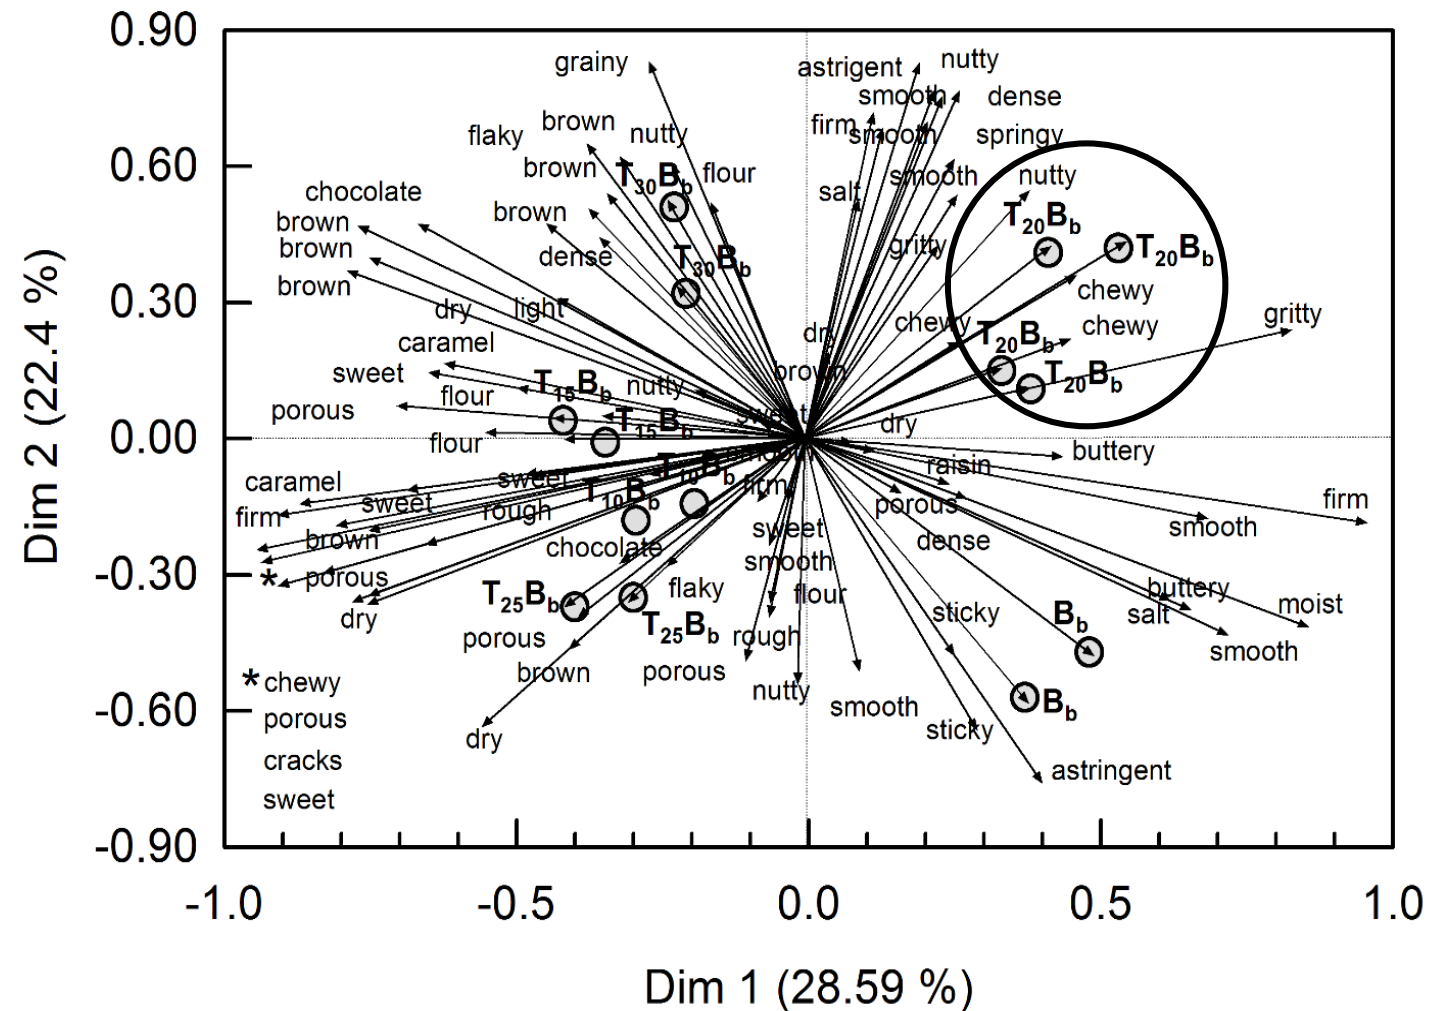

## Results: Effects on proximate composition of breads

| Nutrients | Tiger nut flour | *Butter bread             |                           | Tea bread                 |                           | Sugar bread               |                           |
|-----------|-----------------|---------------------------|---------------------------|---------------------------|---------------------------|---------------------------|---------------------------|
|           |                 | Without tiger nut flour   | with 10% tiger nut flour  | Without tiger nut flour   | with 25 % tiger nut flour | Without tiger nut flour   | with 30 % tiger nut flour |
| Protein   | 6.55 ± 0.23     | 12.67 ± 0.35 <sup>a</sup> | 11.86 ± 0.33 <sup>b</sup> | 13.56 ± 0.28 <sup>a</sup> | 11.14 ± 0.34 <sup>b</sup> | 12.92 ± 0.09 <sup>a</sup> | 10.90 ± 0.08 <sup>b</sup> |
| Fat       | 8.25 ± 0.06     | 15.29 ± 0.07 <sup>a</sup> | 16.30 ± 0.08 <sup>b</sup> | 9.03 ± 0.01 <sup>a</sup>  | 10.04 ± 0.01 <sup>b</sup> | 10.50 ± 0.22 <sup>a</sup> | 11.34 ± 0.22 <sup>b</sup> |
| Fibre     | 9.52 ± 0.11     | 1.29 ± 0.05 <sup>a</sup>  | 2.10 ± 0.04 <sup>b</sup>  | 1.07 ± 0.04 <sup>a</sup>  | 3.49 ± 0.01 <sup>b</sup>  | 3.15 ± 0.09 <sup>a</sup>  | 5.17 ± 0.06 <sup>b</sup>  |
| Ash       | 2.59 ± 0.05     | 1.43 ± 0.04 <sup>a</sup>  | 1.62 ± 0.04 <sup>b</sup>  | 1.30 ± 0.06 <sup>a</sup>  | 1.89 ± 0.07 <sup>b</sup>  | 1.06 ± 0.02 <sup>a</sup>  | 1.56 ± 0.02 <sup>a</sup>  |
| CHO       | 73.09 ± 0.30    | 69.32 ± 0.48 <sup>a</sup> | 68.79 ± 0.46 <sup>b</sup> | 75.04 ± 0.25 <sup>a</sup> | 73.45 ± 0.29 <sup>b</sup> | 72.36 ± 0.17 <sup>a</sup> | 71.04 ± 0.15 <sup>a</sup> |

\*Values in the same rows of bread categories marked by different superscripts are significantly different at p<0.05

- Bread products show
  - improved content of fat, fibre and minerals
  - lower content of protein and carbohydrate

## Conclusion

- Partial substitution of wheat flour with tiger nut flour (TNF) for bread
  - increased bread brownness & specific volume in the order:  $S_b > T_b > B_b$
  - increased crumb firmness in the order:  $S_b > T_b > B_b$
- 10 % TNF for  $B_b$  and 25 % TNF for  $T_b$  gave the highest consumer acceptance
- 30 % TNF improved some consumer-preferred attributes of  $S_b$ , but was not significant for overall consumer acceptance
- Substitution was important for improving fibre, fat and minerals and may be more relevant for improving the properties of  $B_b$  and  $T_b$  than  $S_b$
- Future studies to focus on cost assessment and willingness-to-buy analyses



**THANK YOU**
